# Supplementary material
Source: MDPI journal article supplement (https://www.mdpi.com/2227-9040/12/2/24)
Supplement: s1 [file s1]

Supplementary

# Investigating the Metallic Nanoparticles Decoration on Reduced Graphene Oxide-Based Sensors Used to Detect Sulfur Dioxide

Elisa Ruiz <sup>1</sup>, Christelle Varenne <sup>1</sup>, Bruno S. De Lima <sup>2</sup>, Thiaka Gueye <sup>1</sup>, Alain Pauly <sup>1</sup>, Jérôme Brunet <sup>1</sup>, Valmor R. Mastelaro <sup>2</sup> and Amadou L. Ndiaye <sup>1,\*</sup>

- <sup>1</sup> Université Clermont Auvergne, Clermont Auvergne INP, CNRS, Institut Pascal, F-63000 Clermont-Ferrand, France; elisa.ruiz206@gmail.com (E.R.); christelle.varenne@uca.fr (C.V.); thiakagueyenne@gmail.com (T.G.); alain.pauly@uca.fr (A.P.); jerome.brunet@uca.fr (J.B.)
- <sup>2</sup> Sao Carlos Institute of Physics, University of Sao Paulo, São Carlos 565-905, SP, Brazil; delimabs@unicamp.br (B.S.D.L.); valmor@ifsc.usp.br (V.R.M.)
- \* Correspondence: amadou.ndiaye@uca.fr

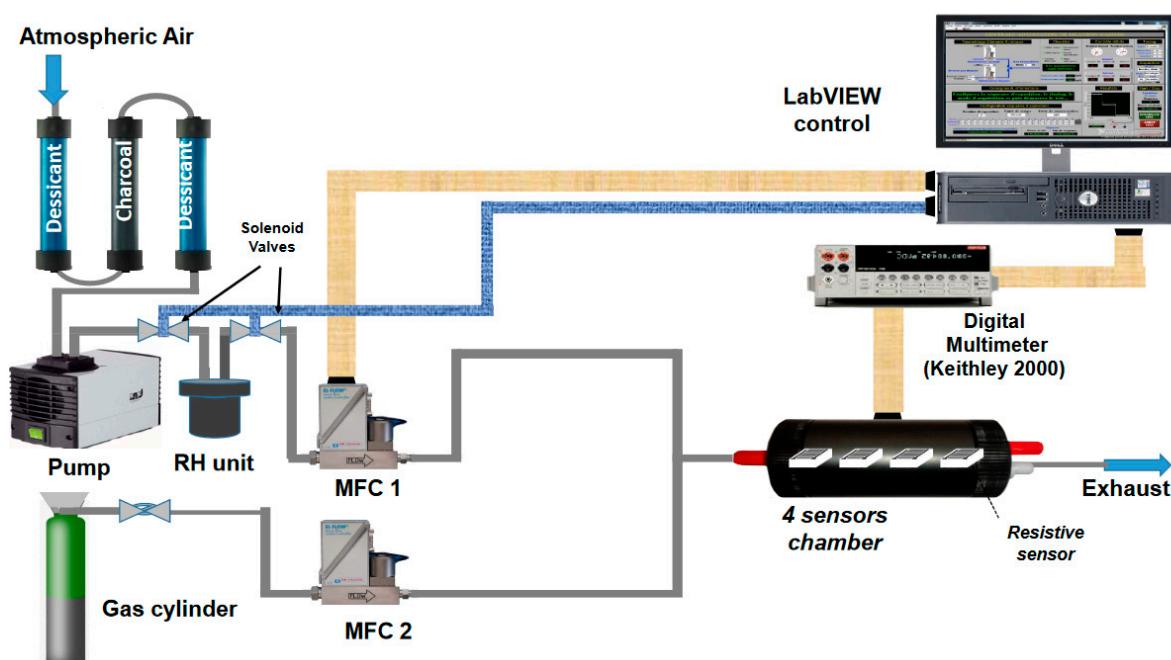

**Scheme S1.** Experimental test bench used for the gas sensing experiment.

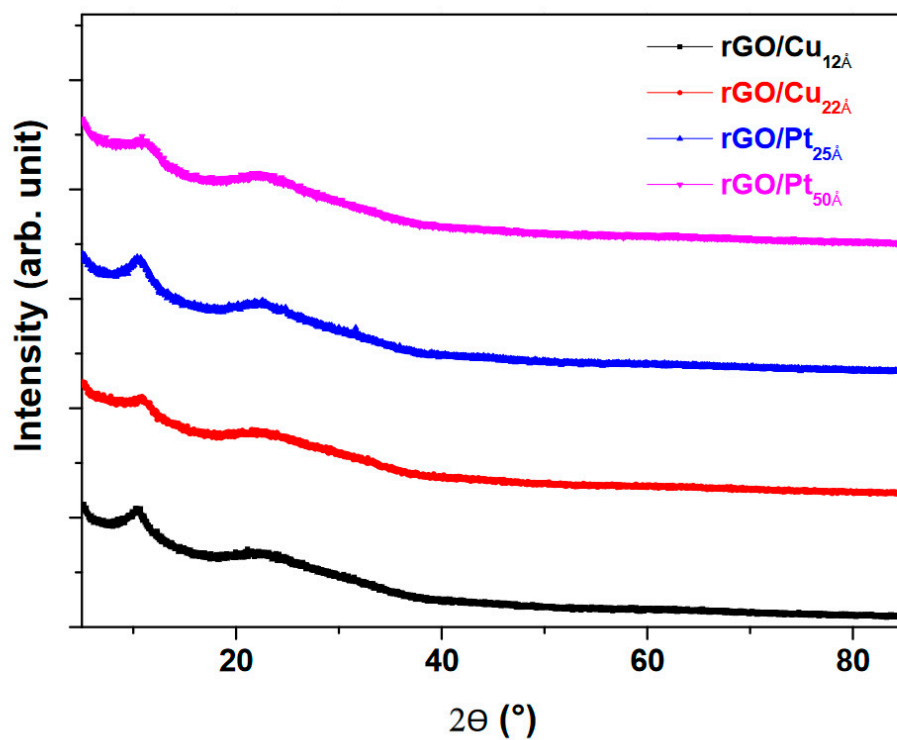

Figure S1. XRD patterns of the physically decorated composites rGO/Cu and rGO/Pt.

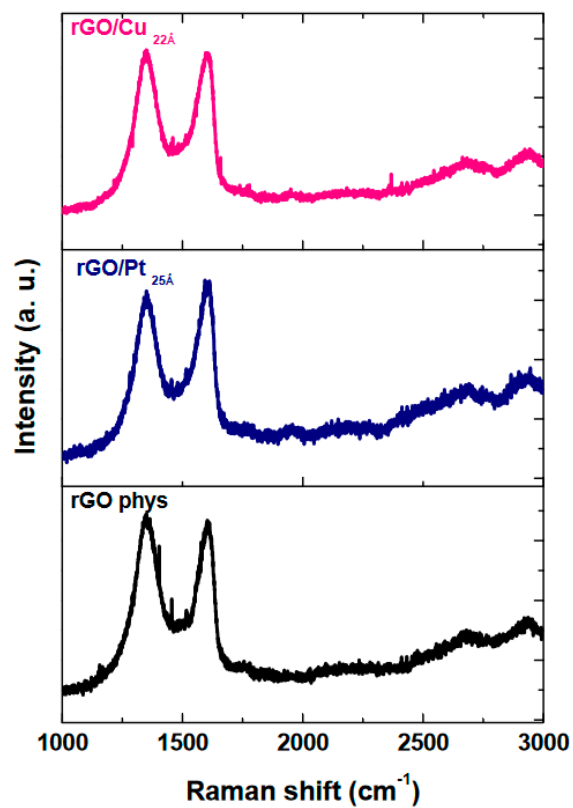

Figure S2. Raman spectra of the rGO and the physically decorated composites rGO/Cu and rGO/Pt.

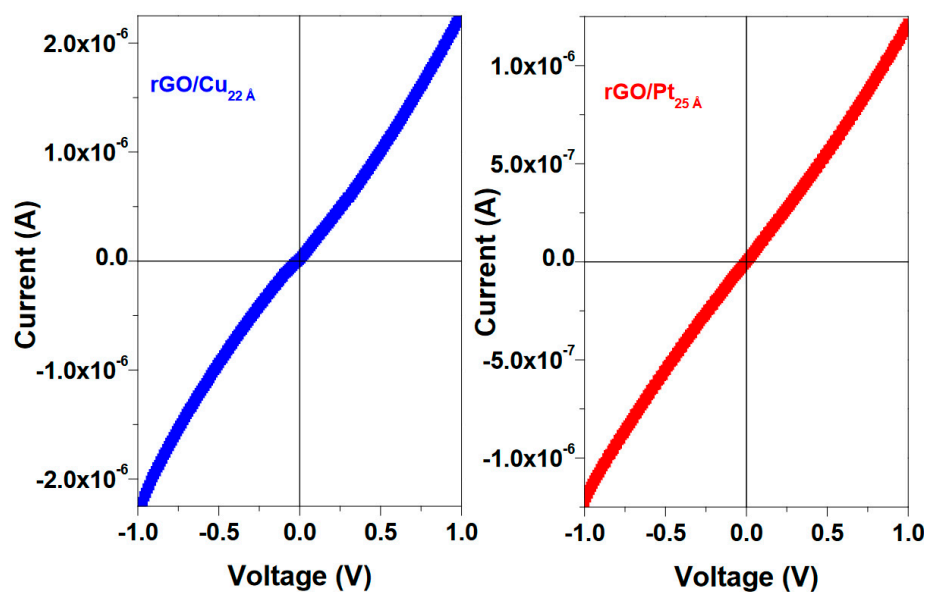

Figure S3. Current-voltage characteristic of rGO/Cu<sub>22Å</sub> and rGO/Pt<sub>25Å</sub> nanocomposites obtained by physical decoration.

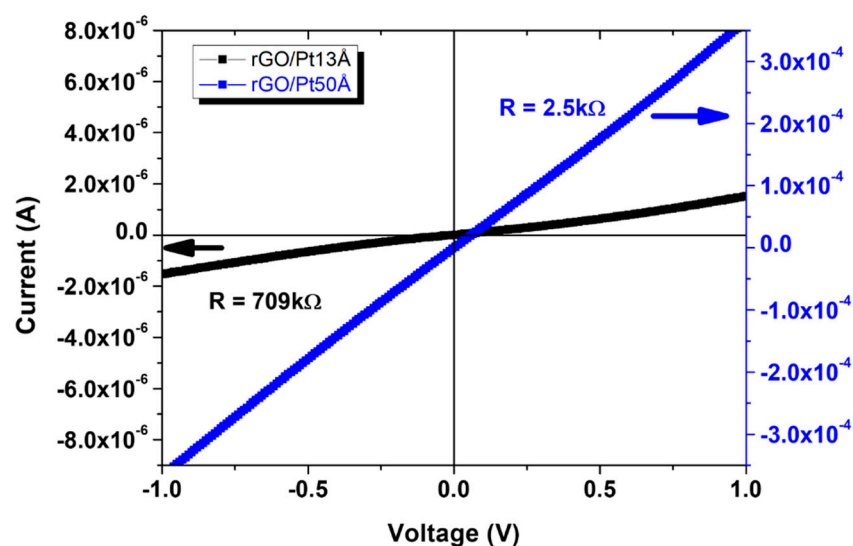

Figure S4. Current-voltage characteristic of rGO/Pt<sub>13Å</sub> and rGO/Pt<sub>50Å</sub> nanocomposites obtained by physical decoration showing the lower resistance value when the deposition time increases.

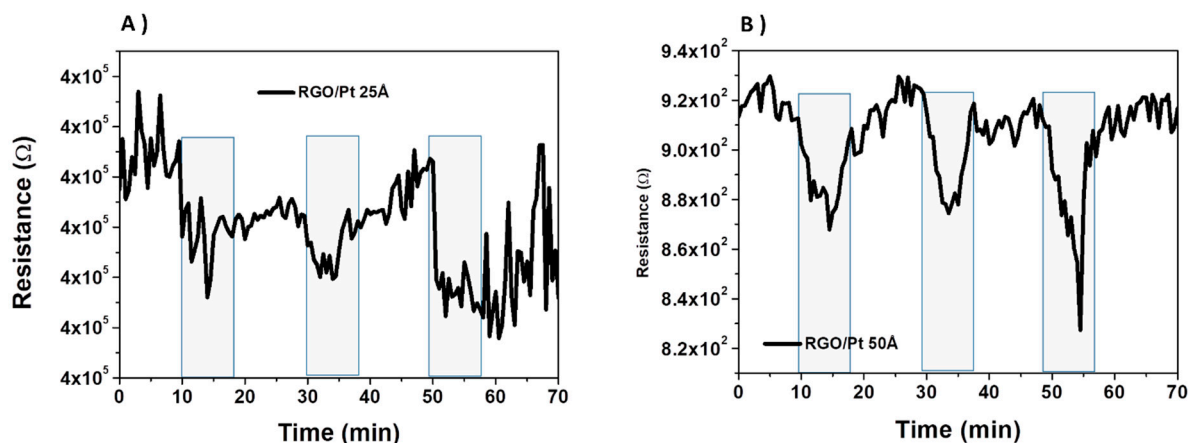

Figure S5. Sensor response of the physically decorated nanocomposites rGO/Pt<sub>25Å</sub> (A); and rGO/Pt<sub>50Å</sub> (B) exposed to SO<sub>2</sub> concentrations of 50, 70 and 90 ppm.

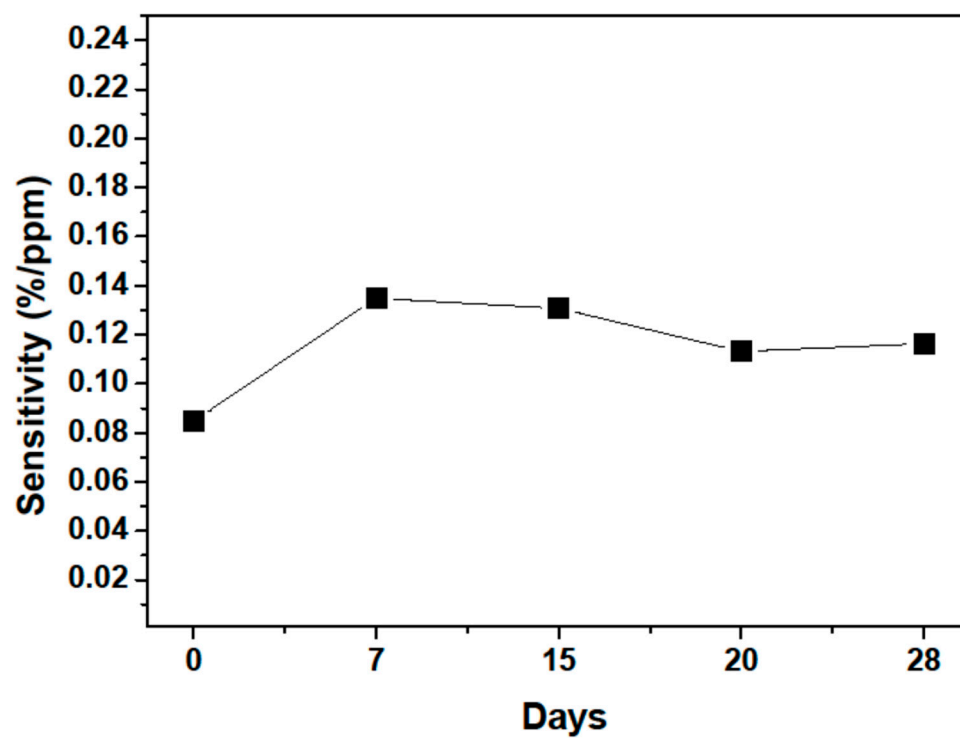

**Figure S6.** Long-term stability experiment of the chemically decorated composites rGO/Cu<sub>2</sub>mg/ml sensor exposed to 30–90 ppm of SO<sub>2</sub> taken at different time intervals.

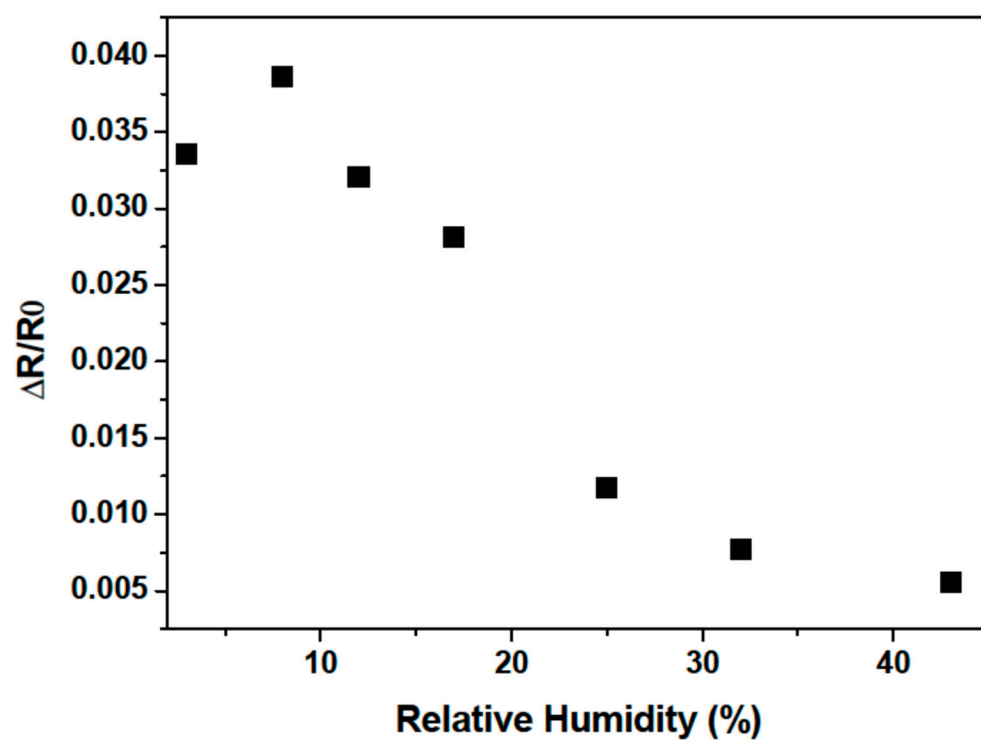

**Figure S7.** Relative resistance variation of the chemically decorated composites rGO/Cu<sub>2</sub>mg/ml sensor exposed to 10 ppm of SO<sub>2</sub> at different humidity levels.
